# Supplementary material for: Expanding the genotype–phenotype spectrum in hereditary colorectal cancer by gene panel testing
Source: Springer Nature journal article supplement (doi:10.1007/s10689-016-9934-0), 2016-09-30
Supplement: MOESM1 [file 10802034]

[Click here to view linked References](#)**Supplementary Table 1 Clinical characteristics of patients in group I to VI**

| Patient no                                                  | Gender | Age at diagnosis | MSI     | IHC loss | Am criteria | No of polyps | CRC | Location | Stage | Other                          |
|-------------------------------------------------------------|--------|------------------|---------|----------|-------------|--------------|-----|----------|-------|--------------------------------|
| <b>I) CRC familial or unknown inheritance not polyposis</b> |        |                  |         |          |             |              |     |          |       |                                |
| 1                                                           | f      | 75               | MSS     | -        | yes         | -            | yes | sigmoid  | -     |                                |
| 2                                                           | f      | 26               | MSS     | -        | no          | -            | yes | cecum    | II    |                                |
| 3                                                           | m      | 60               | MSS     | -        | no          | -            | yes | sigmoid  | III   |                                |
| 4                                                           | m      | 27               | MSS     | -        | yes         | -            | yes | -        | II    | ulcerative colitis at 10 years |
| 5                                                           | f      | 41               | MSS     | -        | yes         | -            | yes | sigmoid  | II    |                                |
| 6                                                           | f      | 41               | MSS     | -        | no          | -            | yes | -        | II    | breast cancer                  |
| 7                                                           | f      | 35               | MSS     | -        | no          | -            | yes | rectum   | III   |                                |
| 8                                                           | f      | 37               | MSS     | -        | no          | -            | yes | rectum   | III   |                                |
| 9                                                           | f      | 62               | MSS     | -        | no          | -            | yes | appendix | -     |                                |
| 10                                                          | f      | 58               | MSS     | -        | yes         | -            | yes | rectum   | -     |                                |
| 11                                                          | f      | 42               | MSS     | -        | yes         | -            | yes | rectum   | -     |                                |
| 12                                                          | f      | -                | MSS     | -        | yes         | -            | yes | rectum   | -     |                                |
| 13                                                          | f      | 33               | MSI low | -        | no          | -            | yes | -        | -     |                                |
| 14                                                          | f      | 51               | MSS     | -        | no          | -            | -   | sigmoid  | -     | breast cancer                  |
| 15                                                          | f      | 52               | MSS     | -        | no          | 1-100        | -   | -        | -     | endometrial cancer             |
| 16                                                          | f      | 82               | MSS     | -        | yes         | -            | -   | cecum    | -     |                                |
| 17                                                          | f      | 46               | MSS     | -        | yes         | -            | yes | rectum   | III   |                                |
| 18                                                          | f      | 53               | MSS     | -        | no          | 1-100        | yes | -        | III   |                                |
| 19                                                          | f      | 40               | MSS     | -        | yes         | 1-100        | yes | -        | III   |                                |
| 20                                                          | m      | 76               | MSS     | -        | no          | 1-100        | yes | sigmoid  | -     |                                |
| 21                                                          | f      | 38               | MSS     | -        | no          | 1-100        | yes | sigmoid  | II    |                                |
| 22                                                          | m      | 74               | MSS     | -        | yes         | -            | yes | rectum   | -     |                                |
| 23                                                          | m      | 48               | MSS     | -        | yes         | -            | yes | cecum    | II    |                                |

|    |   |    |       |           |     |       |     |            |     |                                          |
|----|---|----|-------|-----------|-----|-------|-----|------------|-----|------------------------------------------|
| 24 | m | 60 | MSS   | -         | yes | 1-100 | yes | sigmoid    | -   |                                          |
| 25 | f | 51 | MSS   | -         | yes | 1-100 | yes | -          | I   |                                          |
| 26 | f | 50 | MSI-H | -         | no  | -     | yes | -          | -   | endometrial cancer                       |
| 27 | f | 40 | MSI-H | -         | no  | 1-100 | yes | ascending  | II  | sigmoid polyps                           |
| 28 | m | 41 | MSS   | -         | no  | -     | yes | transverse | -   |                                          |
| 29 | m | 31 | MSS   | -         | no  | -     | -   | -          | -   |                                          |
| 30 | f | 32 | MSS   | -         | no  | -     | yes | -          | -   |                                          |
| 31 | f | 23 | MSS   | -         | no  | -     | yes | sigmoid    | III |                                          |
| 32 | f | 31 | MSS   | -         | yes | -     | yes | -          | -   |                                          |
| 33 | f | 51 | MSS   | -         | -   | -     | yes | -          | -   |                                          |
| 34 | f | 66 | MSI-H | MLH1/PMS2 | no  | -     | yes | caecum     | II  |                                          |
| 35 | f | 61 | MSI-H | MLH1/PMS2 | no  | -     | yes | caecum     | II  |                                          |
| 36 | m | 51 | MSI-H | MLH1/PMS2 | no  | -     | yes | rectum     | II  | rectal cancer                            |
| 37 | f | 70 | MSI-H | MLH1/PMS2 | no  | -     | yes | transverse | II  | endometrial cancer                       |
| 38 | f | 63 | MSI-H | MLH1/PMS2 | no  | -     | no  | -          | I   | endometrial cancer                       |
| 39 | m | 49 | MSI-H | MLH1/PMS2 | no  | -     | yes | ascendens  | II  |                                          |
| 40 | f | 61 | MSI-H | -         | no  | -     | yes | ascendens  | II  |                                          |
| 41 | f | 57 | MSI-H | MLH1/PMS2 | yes | -     | yes | ascendens  | III |                                          |
| 42 | f | 50 | MSI-H | MLH1/PMS2 | no  | -     | yes | ascendens  | II  |                                          |
| 43 | f | 41 | MSI-H | MLH1/PMS2 | no  | -     | yes | transverse | II  |                                          |
| 44 | f | 38 | MSI-H | MLH1/PMS2 | no  | -     | yes | ascendens  | IV  | breast cancer, 32 years                  |
| 45 | f | 40 | MSI-H | MLH1/PMS2 | yes | -     | no  | -          | I   | endometrial cancer                       |
| 46 | f | 57 | MSI-H | MLH1/PMS2 | no  | -     | no  | -          | I   | endometrial cancer                       |
| 47 | f | 68 | MSI-H | MLH1/PMS2 | no  | -     | yes | ascendens  | II  | endometrial cancer, 53 years             |
| 48 | f | 55 | MSI-H | MSH6      | no  | -     | yes | ascendens  | II  | synchronous endometrial cancer, 55 years |
| 49 | f | 21 | MSI-H | MSH6      | no  | -     | yes | rectum     | III | childhood brain tumour                   |
| 50 | f | 80 | MSI-H | MSH6      | yes | -     | yes | ascendens  | II  | endometrial cancer, 50 years             |

|                                                                          |   |    |       |   |     |          |     |              |     |                                                                    |
|--------------------------------------------------------------------------|---|----|-------|---|-----|----------|-----|--------------|-----|--------------------------------------------------------------------|
| 51                                                                       | f | 35 | MSI-H | - | no  | -        | yes | rectum       | III |                                                                    |
| 52                                                                       | m | 76 | MSS   | - | yes | -        | yes | ascendens    | II  |                                                                    |
| 54                                                                       | f | 48 | MSI-H | - | no  | -        | -   | -            | I   | endometrial cancer                                                 |
| 55                                                                       | f | 79 | MSS   | - | no  | -        | yes | rectum       | II  | rectal cancer                                                      |
| 56                                                                       | m | 54 | MSI-H | - | yes | -        | yes | rectum       | I   | rectal cancer                                                      |
| 57                                                                       | m | 41 | MSI-H | - | no  | -        | yes | ascendens    | III |                                                                    |
| 91                                                                       | m | 39 | MSI-H | - | yes | -        | yes | -            | -   |                                                                    |
| 92                                                                       | f | 45 | MSI-H | - | no  | -        | yes | -            | -   | endometrial cancer, 45 years,<br>breast cancer, 53 years           |
| <b>II) Unexplained adenomatous polyposis &gt;100 polyps, inheritance</b> |   |    |       |   |     |          |     |              |     |                                                                    |
| 58                                                                       | f | 17 | -     | - | -   | >1000    | no  | -            | -   |                                                                    |
| 59                                                                       | f | 31 | -     | - | -   | 101-1000 | yes | descending   | -   | several family members with polyps<br>and crc                      |
| <b>III) Unexplained adenomatous polyposis 1-100 polyps, inheritance</b>  |   |    |       |   |     |          |     |              |     |                                                                    |
| 60                                                                       | - | 21 | -     | - | -   | 1-100    | -   | -            | -   |                                                                    |
| 61                                                                       | m | -  | -     | - | -   | -        | -   | -            | -   |                                                                    |
| 62                                                                       | f | 38 | -     | - | -   | 1-100    | -   | descending   | -   |                                                                    |
| 63                                                                       | f | 45 | MSS   | - | -   | 1-100    | -   | sigmoid      | -   |                                                                    |
| 64                                                                       | m | 35 | -     | - | -   | 1-100    | -   | -            | -   | tubular polyps                                                     |
| 65                                                                       | m | 66 | -     | - | -   | 1-100?   | yes | -            | -   |                                                                    |
| 66                                                                       | f | 41 | -     | - | -   | 1-100    | yes | rectum       | -   | sister of the paternal grandmother<br>with breast cancer, 31 years |
| 67                                                                       | f | 41 | -     | - | -   | 1-100    | yes | -            | -   |                                                                    |
| <b>IV) Unexplained adenomatous polyposis unknown inheritance</b>         |   |    |       |   |     |          |     |              |     |                                                                    |
| 68                                                                       | f | 84 | -     | - | -   | 1-100    | -   | -            | -   |                                                                    |
| 69                                                                       | m | 48 | -     | - | -   | 1-100    | yes | rectum       | -   | duodenal polyp                                                     |
| 70                                                                       | m | 57 | -     | - | -   | 1-100    | yes | descending   | -   | FGP                                                                |
| 71                                                                       | f | 47 | -     | - | -   | 1-100    | yes | sigmoid (x2) | -   | flat adenomas                                                      |
| 72                                                                       | m | 31 | -     | - | -   | 1-100    | no  | -            | -   | FGP                                                                |

|                                                                                                                                       |   |     |     |   |     |         |     |                 |     |                                                  |
|---------------------------------------------------------------------------------------------------------------------------------------|---|-----|-----|---|-----|---------|-----|-----------------|-----|--------------------------------------------------|
| 73                                                                                                                                    | m | 58  | -   | - | -   | 1-100   | no  | -               | -   |                                                  |
| 74                                                                                                                                    | f | 46  | -   | - | -   | 1-100   | yes | -               | -   |                                                  |
| 75                                                                                                                                    | m | 60  | -   | - | -   | 1-100   | yes | sigmoid         | -   |                                                  |
| 76                                                                                                                                    | f | 52  | -   | - | -   | 1-100   | yes | descending      | -   |                                                  |
| <b>V) Familial or simplex atypical polyposis/mixed polyposis/serrated polyposis</b>                                                   |   |     |     |   |     |         |     |                 |     |                                                  |
| 77                                                                                                                                    | f | 60  | -   | - | -   | 1-100   | yes | rectum          | -   | atypical polyposis                               |
| 78                                                                                                                                    | f | 50  | -   | - | -   | 1-1000  | yes | rectum          | -   |                                                  |
| 79                                                                                                                                    | f | 50  | -   | - | -   | 1-100   | yes | descending (x3) | -   |                                                  |
| 80                                                                                                                                    | f | 51  | -   | - | -   | 1-100   | no  | -               | -   | duodenal polyps                                  |
| 81                                                                                                                                    | f | 11  | -   | - | -   | 1-100   | -   | -               | -   | no inheritance                                   |
| 82                                                                                                                                    | m | 45  | MSS | - | no  | 1-100   | -   | -               | -   |                                                  |
| 83                                                                                                                                    | f | 54  | -   | - | -   | 1-100   | yes | -               | -   | breast cancer, 59 years                          |
| 84                                                                                                                                    | f | 36  | -   | - | -   | 100-200 | -   | -               | -   | mixed polyposis                                  |
| 85                                                                                                                                    | m | 71  | -   | - | -   | 1-100   | -   | -               | -   | several family members and both parents with crc |
| 86                                                                                                                                    | m | 74  | -   | - | -   | 1-100   | -   | -               | -   |                                                  |
| 87                                                                                                                                    | m | <50 | -   | - | -   | 1-100   | -   | -               | -   | mixed polyposis                                  |
| 88                                                                                                                                    | f | -   | -   | - | -   | 1-100   | -   | -               | -   | mixed polyposis                                  |
| <b>VI) Polymerase proofreading associated polyposis (PPAP)</b>                                                                        |   |     |     |   |     |         |     |                 |     |                                                  |
| 89                                                                                                                                    | f | -   | MSS | - | yes | 1-100   | yes | -               | -   | See Rohlin et al 2014                            |
| 90                                                                                                                                    | m | 43  | MSS | - | no  | -       | yes | sigmoid         | III | See Rohlin et al 2016                            |
| neg-negative, Am-Amsterdam, FGP-fundic gland polyps, IHC-immunohistochemistry, MSS-microsatellite stable, MSI-microsatellite instable |   |     |     |   |     |         |     |                 |     |                                                  |
